# Supplementary material
Source: PubMed Central journal article supplement (PMC4382033)
Supplement: supp_3.1.E68_2014-0044-3-at.pdf [file supp_3.1.E68_2014-0044-3-at.pdf]

### Appendix 3 (as supplied by the authors): Study Characteristics - full details

| Article                   | Fraser LK et al 2013 <sup>1</sup>                                                                                                                                                                               | Keele L et al 2013 <sup>2</sup>                                                                                                                                                                                                                                | Dussel V et al 2009 <sup>3</sup>                                                                                                                                                                                                                                                      |
|---------------------------|-----------------------------------------------------------------------------------------------------------------------------------------------------------------------------------------------------------------|----------------------------------------------------------------------------------------------------------------------------------------------------------------------------------------------------------------------------------------------------------------|---------------------------------------------------------------------------------------------------------------------------------------------------------------------------------------------------------------------------------------------------------------------------------------|
| <b>Objective</b>          | Assessed the impact of specialist pediatric palliative care services carried by a pediatric hospice                                                                                                             | Compared demographic and clinic characteristics of patients who received palliative care consultations to those who did not                                                                                                                                    | <ul style="list-style-type: none"> <li>• Determined association of modifiable clinical factors with parental planning of LOD</li> <li>• Explored whether planning of the child's LOD had any impact on patterns of care and the parent's experience with child's EOL</li> </ul>       |
| <b>Participants</b>       | Children who died from cancer (0-19 years), diagnosed between 1996 to 2009, and who died before Sep 2011                                                                                                        | Children (<18 years of age), who died at hospital >5 days after admission, from all causes of death with complete administrative data on charges and hospital admissions between 2001-2011 (patients discharged < 5 days under hospice care were not included) | Children who died from cancer from 2 tertiary centres whose physicians authorized the researchers to contact the family. Deaths occurred between 1990 and 1999. Families were interviewed between 1997 and 2001                                                                       |
| <b>Study design</b>       | Cohort comparison                                                                                                                                                                                               | <ul style="list-style-type: none"> <li>• Retrospective administrative database analysis</li> <li>• Pediatric Health Information System (PHIS) database developed by collaboration of &gt;40 children's hospitals across the states</li> </ul>                  | <ul style="list-style-type: none"> <li>• Retrospective cross-sectional survey of bereaved parents</li> <li>• Retrospective Chart review</li> </ul>                                                                                                                                    |
| <b>Observation period</b> | Referral to death                                                                                                                                                                                               | Last admission before death                                                                                                                                                                                                                                    | Last month of life                                                                                                                                                                                                                                                                    |
| <b>n</b>                  | 497                                                                                                                                                                                                             | 24342                                                                                                                                                                                                                                                          | 140                                                                                                                                                                                                                                                                                   |
| <b>Data sources</b>       | <ul style="list-style-type: none"> <li>• Secondary data base analysis</li> <li>• Linked data from specialist pediatric palliative care services, Register of Cancer, NHS Hospital episode statistics</li> </ul> | Secondary analysis of the Pediatric Health Information System including > 40 hospitals across the country                                                                                                                                                      | <ul style="list-style-type: none"> <li>• Parental survey: 390 questions, partially validated, carried over the phone or in person</li> <li>• Patient charts</li> </ul>                                                                                                                |
| <b>Intervention Group</b> | <b>Hospice Group (n=132)</b><br>Patients referred to a specialist palliative care service carried by a pediatric hospice                                                                                        | <b>Palliative care group (n=919)</b><br>Palliative care consultation in the last admission (measured by billing code for ICD9 - PC V66.7)                                                                                                                      | <b>Planned LOD (n=88)</b>                                                                                                                                                                                                                                                             |
| <b>Comparator</b>         | <b>Control group (n = 311)</b><br>Patients not referred to hospice services                                                                                                                                     | <b>No palliative care (n=23423)</b><br>No palliative care consultation in the last admission (no billing code)                                                                                                                                                 | <b>Did not plan LOD (n=52)</b>                                                                                                                                                                                                                                                        |
| <b>Setting</b>            | Residents in the Yorkshire Health Authority, UK                                                                                                                                                                 | Children who died across > 40 US Children's Hospitals part of the Children's Hospital Association (USA) database                                                                                                                                               | Dana-Farber Cancer Institute/Children's Hospital Boston, and Children's Hospitals and Clinics of Minnesota, USA                                                                                                                                                                       |
| <b>Outcomes</b>           | <ul style="list-style-type: none"> <li>• Primary: Total number of hospital admissions</li> <li>• Secondary: Number of planned hospital admissions; Number of emergency hospital admissions</li> </ul>           | Age, gender, LOS, major group category diagnostic, medications, procedures in the last admission                                                                                                                                                               | EOL planning, EOL support from physicians, use of home care, hospital resources utilization, place of death                                                                                                                                                                           |
| <b>Funding</b>            | Not disclosed                                                                                                                                                                                                   | No external funding was received. The authors disclosed no conflict of interest                                                                                                                                                                                | No conflict of interest was disclosed. Different sources of funding supported the authors (Agency for Health Research and Quality, National Cancer Institute, Child Health Research Grant from the Charles H. Hood Foundation, Pine Tree Apple Tennis Classic Oncology Research Fund) |

### Appendix 3: Study Characteristics - full details (cont.)

| Article                          | Knapp CA et al 2009 <sup>4</sup>                                                                                                                                                                                                                    | Arland LC et al 2013 <sup>5</sup>                                                                                                                                                                       | Postier et al 2014 <sup>6</sup>                                                                                                                                                                                                                      |
|----------------------------------|-----------------------------------------------------------------------------------------------------------------------------------------------------------------------------------------------------------------------------------------------------|---------------------------------------------------------------------------------------------------------------------------------------------------------------------------------------------------------|------------------------------------------------------------------------------------------------------------------------------------------------------------------------------------------------------------------------------------------------------|
| <b>Objective</b>                 | <ul style="list-style-type: none"> <li>Described demographic characteristics, cause and LOD, and expenditure patterns of hospice users and nonusers</li> <li>Investigated hospice expenditure variations and characteristics of children</li> </ul> | Investigated relationship between changes in outcomes and an EOL program                                                                                                                                | Explored healthcare service utilization by children prior/after enrollment in home-based PPCP/hospice program carried by a tertiary care provider                                                                                                    |
| <b>Participants</b>              | Children who died in and were residents of Florida state (1-21 years) between Jul 2003 - Jun 2006 and were enrolled in the Medicaid program                                                                                                         | Children who died of brain tumors (1 month - 19 years), with documented LOD and reason for hospital admission                                                                                           | Children enrolled in the home PPCP/hospice program (1 to 21 years old) for at least 1 day between 2000- 2010 (excluded children < 1 year old)                                                                                                        |
| <b>Study design</b>              | Retrospective administrative data analysis                                                                                                                                                                                                          | Pre-post observational study - both periods included hospice care as part of the EOL care                                                                                                               | Pre-post observational study                                                                                                                                                                                                                         |
| <b>Observation period</b>        | Last year of life                                                                                                                                                                                                                                   | <ul style="list-style-type: none"> <li>Before standardization: 5 years</li> <li>After standardization: 10 years</li> </ul>                                                                              | <ul style="list-style-type: none"> <li>Before enrollment: 12 months</li> <li>After enrollment: 12 months</li> </ul>                                                                                                                                  |
| <b>n</b>                         | 1527                                                                                                                                                                                                                                                | 114                                                                                                                                                                                                     | 425                                                                                                                                                                                                                                                  |
| <b>Data sources/ measurement</b> | Medicaid claims, encounter and enrollment files, death certificate                                                                                                                                                                                  | Retrospective chart review                                                                                                                                                                              | <ul style="list-style-type: none"> <li>Retrospective secondary data analysis</li> <li>Electronic medical records and accounting system for billed charges</li> </ul>                                                                                 |
| <b>Intervention Group</b>        | <b>Hospice use (n= 85)</b>                                                                                                                                                                                                                          | <b>After group (n= 92 / 1996-2005)</b><br>Standardized EOL care program coordinated by a hospital (comprehensive EOL discussions, medications for symptom control, primary family liaison, home visits) | <b>Pre-PPCP</b>                                                                                                                                                                                                                                      |
| <b>Comparator</b>                | <b>Non-hospice use (n= 848)</b>                                                                                                                                                                                                                     | <b>Before Group (n= 22 /1990-1995)</b><br>Non standardized EOL care managed by individual hospices in the geographic area (not specialized in pediatric palliative care)                                | <b>Post-PPCP</b>                                                                                                                                                                                                                                     |
| <b>Setting</b>                   | Florida, USA                                                                                                                                                                                                                                        | Children's Hospital Colorado, Colorado, USA (program implemented in 1995).                                                                                                                              | Children's Hospitals and Clinics of Minnesota's (CHC) Homecare, Pain Medicine, Palliative Care & Integrative Medicine Programs, Minnesota, USA                                                                                                       |
| <b>Outcomes measured</b>         | <ul style="list-style-type: none"> <li>Hospice use</li> <li>Hospice expenditures</li> </ul>                                                                                                                                                         | <ul style="list-style-type: none"> <li>Symptoms</li> <li>Hospitalizations (number and LOS)</li> <li>Location of death</li> </ul>                                                                        | Change in number of hospitalizations, LOS, and total billed charges for hospital/ER stays                                                                                                                                                            |
| <b>Funding</b>                   | No conflict of interest was disclosed. Source of funding not disclosed                                                                                                                                                                              | Did not state funding. Authors reported no conflict of interest but some of them occupied positions in Children's Hospital Colorado.                                                                    | No funding was received for the research. Authors disclosed no conflict of interest. However, four authors were employees in the Department of Pain Medicine, Palliative Care & Integrative Medicine, Children's Hospitals and Clinics of Minnesota. |

### Appendix 3: Study Characteristics - full details (cont.)

| Article                         | Gans D et al 2012 <sup>7</sup>                                                                                                                                                                                                                                                                                                                                                                     | Pascuet E et al 2010 <sup>8</sup>                                                                                                                                               | Smith A et al 2013 <sup>9</sup>                                                                                                                                   |
|---------------------------------|----------------------------------------------------------------------------------------------------------------------------------------------------------------------------------------------------------------------------------------------------------------------------------------------------------------------------------------------------------------------------------------------------|---------------------------------------------------------------------------------------------------------------------------------------------------------------------------------|-------------------------------------------------------------------------------------------------------------------------------------------------------------------|
| <b>Objective</b>                | Demonstrated shift in healthcare resource use and cost with the implementation of a community palliative care program                                                                                                                                                                                                                                                                              | Measured differences in hospital utilization and costs with the use of respite services at a pediatric hospice                                                                  | Evaluated PPCP utilization among the most costly hospitalized patients<br>Examined factors associated with receipt of PPCP and inpatient costs.                   |
| <b>Participants</b>             | Children living with life-threatening conditions (0 to 20 years old), enrolled in a community based pediatric palliative care program (implemented in 2010)                                                                                                                                                                                                                                        | Children with life-limiting illnesses (age range not defined) who used 'Respite' at the pediatric Hospice at least once from May 2005 to Feb 2009                               | The ten percent most costly patients, in 2010, among all patients discharged from Primary Children's Medical Center (PCMC)                                        |
| <b>Study design</b>             | <ul style="list-style-type: none"> <li>Pre-post assessment of healthcare utilization and expenditures</li> <li>Brief report</li> </ul>                                                                                                                                                                                                                                                             | Pre-Post observational study                                                                                                                                                    | Cohort comparison between who received PPCP and those who did not<br>Pre-post assessment in the PPCP cohort before/after the initial palliative care consultation |
| <b>Observation period</b>       | <ul style="list-style-type: none"> <li>Before: 12 months? (2009, first and last months unclear)</li> <li>After: 18 months (January 2010 to September 2011)</li> </ul>                                                                                                                                                                                                                              | <ul style="list-style-type: none"> <li>Before 1st respite: 12 months</li> <li>After 1st respite: 12 months</li> </ul>                                                           | Cohort comparison: up to 2 years<br>Pre-post: undisclosed                                                                                                         |
| <b>n</b>                        | 123                                                                                                                                                                                                                                                                                                                                                                                                | 66                                                                                                                                                                              | 1001                                                                                                                                                              |
| <b>Data sources/measurement</b> | <ul style="list-style-type: none"> <li>Secondary analysis of claims databases (MIS/DSS claims, MEDS and CMS Net)</li> <li>Family quality of life and satisfaction survey</li> </ul>                                                                                                                                                                                                                | <ul style="list-style-type: none"> <li>Retrospective chart review</li> <li>Non-randomized</li> </ul>                                                                            | Undisclosed                                                                                                                                                       |
| <b>Intervention Group</b>       | <b>After PPCP</b> <ul style="list-style-type: none"> <li>Included coordination of care and community resources, massage, art, play and music therapy</li> <li>Family education and training in devices operation</li> <li>Family counseling and bereavement, pain and symptom management, respite out of home, hospice facilities (not necessarily specialized in pediatric population)</li> </ul> | <b>Before respite</b>                                                                                                                                                           | <b>PPCP Group (n=81):</b> patients who used the program                                                                                                           |
| <b>Comparator</b>               | <b>Before PPCP</b>                                                                                                                                                                                                                                                                                                                                                                                 | <b>After respite</b>                                                                                                                                                            | <b>Control Group (n= 920):</b> patients who did not use the program                                                                                               |
| <b>Setting</b>                  | <ul style="list-style-type: none"> <li>11 counties in California, USA</li> <li>Program included several healthcare providers (home care providers, hospices and contract agencies who voluntarily participated in the program)</li> </ul>                                                                                                                                                          | <ul style="list-style-type: none"> <li>Roger's House Pediatric Hospice (RH), Ontario, Canada</li> <li>Children's Hospital of Eastern Ontario (CHEO), Ontario, Canada</li> </ul> | Primary Children's Medical Center (PCMC), Salt Lake City, Utah, USA                                                                                               |
| <b>Outcomes measured</b>        | <ul style="list-style-type: none"> <li>LOS</li> <li>Medical Expenditures</li> <li>Family's quality of life and satisfaction</li> </ul>                                                                                                                                                                                                                                                             | <ul style="list-style-type: none"> <li>LOS</li> <li>ER and Outpatient visits</li> <li>Overall Cost in hospital/hospice admission</li> </ul>                                     | <ul style="list-style-type: none"> <li>Cost</li> <li>Demographics</li> <li>Use of technology</li> </ul>                                                           |
| <b>Funding</b>                  | Policy brief supported by Children's Hospice & Palliative Care Coalition (CHPCC)<br>All authors belonged to UCLA University.                                                                                                                                                                                                                                                                       | Funded by the Hospice                                                                                                                                                           | Did not state funding.<br>First author is employed by the hospital where the research was conducted                                                               |

### Appendix 3: Study Characteristics - full details (cont.)

| Article                                                                                                           | Ward-Smith P et al 2008 <sup>10</sup>                                                                                                                                                                                                                                                                                                                                                                                                                                                                                                                                                              | Belasco JB et al 2000 <sup>11</sup>                                                                                                                                                                                                                                                                                                                                                                                                                                                                                                 |
|-------------------------------------------------------------------------------------------------------------------|----------------------------------------------------------------------------------------------------------------------------------------------------------------------------------------------------------------------------------------------------------------------------------------------------------------------------------------------------------------------------------------------------------------------------------------------------------------------------------------------------------------------------------------------------------------------------------------------------|-------------------------------------------------------------------------------------------------------------------------------------------------------------------------------------------------------------------------------------------------------------------------------------------------------------------------------------------------------------------------------------------------------------------------------------------------------------------------------------------------------------------------------------|
| <b>Objective</b>                                                                                                  | Compared inpatient hospital costs associated with PPCP carried by a tertiary provider                                                                                                                                                                                                                                                                                                                                                                                                                                                                                                              | Compared cost of care at home versus at the hospital                                                                                                                                                                                                                                                                                                                                                                                                                                                                                |
| <b>Participants</b>                                                                                               | <ul style="list-style-type: none"> <li>• Children enrolled in the PPCP within 6 months prior to death (age range not specified)</li> <li>• Cases: identified within 18 months, 2 years after PPCP became fully implemented</li> <li>• Controls: criteria for matching not stated (potentially by diagnosis), period not specified</li> <li>• Exclusion criteria: children in the neonatal intensive care unit; those who died within 72 hours of initial admission; patients with incomplete medical records; and patients who enrolled in the PPCP program less than 30 days to death.</li> </ul> | <ul style="list-style-type: none"> <li>• Children referred to a home based pediatric palliative care program between 1988-1992 (age bracket not specified) carried by a tertiary care provider</li> <li>• Applied costs from 1995 and 1996.</li> <li>• Of 154 patients enrolled in the PPCP during the study period, some were selected to reflect medically complicated patients whose level of care at home was comparable to being at the hospital and differed only in palliative intent rather than intent to cure.</li> </ul> |
| <b>Study design</b>                                                                                               | Retrospective matched case-control                                                                                                                                                                                                                                                                                                                                                                                                                                                                                                                                                                 | Case series                                                                                                                                                                                                                                                                                                                                                                                                                                                                                                                         |
| <b>Observation period</b>                                                                                         | 6 months prior to death                                                                                                                                                                                                                                                                                                                                                                                                                                                                                                                                                                            | 1 day                                                                                                                                                                                                                                                                                                                                                                                                                                                                                                                               |
| <b>n</b>                                                                                                          | 18                                                                                                                                                                                                                                                                                                                                                                                                                                                                                                                                                                                                 | 3                                                                                                                                                                                                                                                                                                                                                                                                                                                                                                                                   |
| <b>Data sources/ measurement</b>                                                                                  | Hospital-based charges                                                                                                                                                                                                                                                                                                                                                                                                                                                                                                                                                                             | Retrospective chart review                                                                                                                                                                                                                                                                                                                                                                                                                                                                                                          |
| <b>Intervention Group</b>                                                                                         | <b>PPCP group (n=9)</b><br>Enrolled in the Pediatric Palliative Care Program                                                                                                                                                                                                                                                                                                                                                                                                                                                                                                                       | <b>Home care</b>                                                                                                                                                                                                                                                                                                                                                                                                                                                                                                                    |
| <b>Comparator</b>                                                                                                 | <b>Non PPCP (n=9)</b><br>Not enrolled in the Pediatric Palliative Care Program                                                                                                                                                                                                                                                                                                                                                                                                                                                                                                                     | <b>Hospital care</b>                                                                                                                                                                                                                                                                                                                                                                                                                                                                                                                |
| <b>Setting</b>                                                                                                    | Children's Mercy Hospital, Kansas, USA                                                                                                                                                                                                                                                                                                                                                                                                                                                                                                                                                             | Children's Hospital Philadelphia, Pennsylvania, USA                                                                                                                                                                                                                                                                                                                                                                                                                                                                                 |
| <b>Outcomes measured</b>                                                                                          | <ul style="list-style-type: none"> <li>• Total hospital costs</li> <li>• LOS</li> <li>• Differences in types of procedures</li> </ul>                                                                                                                                                                                                                                                                                                                                                                                                                                                              | <ul style="list-style-type: none"> <li>• Type of interventions delivered.</li> <li>• Place of death</li> <li>• Comparison of charges of care</li> </ul>                                                                                                                                                                                                                                                                                                                                                                             |
| <b>Funding</b>                                                                                                    | No funding was disclosed.<br>Authors were employees of Children's Mercy Hospital                                                                                                                                                                                                                                                                                                                                                                                                                                                                                                                   | No funding was disclosed.<br>Authors were employees of Children's Hospital Pennsylvania.                                                                                                                                                                                                                                                                                                                                                                                                                                            |
| Note: EOL = end of life, LOD = location of death, LOS = length of stay, PPCP = pediatric palliative care program. |                                                                                                                                                                                                                                                                                                                                                                                                                                                                                                                                                                                                    |                                                                                                                                                                                                                                                                                                                                                                                                                                                                                                                                     |

### References

1. Fraser LK, van Laar M, Miller M, et al. Does referral to specialist paediatric palliative care services reduce hospital admissions in oncology patients at the end of life? *Br J Cancer* 2013;108:1273-9.
2. Keele L, Keenan HT, Sheetz J, et al. Differences in characteristics of dying children who receive and do not receive palliative care. *Pediatrics* 2013;132:72-8.
3. Dussel V, Kreicbergs U, Hilden JM, et al. Looking beyond where children die: determinants and effects of planning a child's location of death. *J Pain Symptom Manage* 2009;37:33-43.
4. Knapp CA, Shenkman E, Marcu M, et al. Pediatric palliative care: describing hospice users and identifying factors that affect hospice expenditures. *J Palliat Med* 2009;12:223-9.
5. Arland LC, Hendricks-Ferguson VL, Pearson J, et al. Development of an in-home standardized end-of-life treatment program for pediatric patients dying of brain tumors. *J Spec Pediatr Nurs* 2013;18:144-57.
6. Postier A, Chrastek J, Nugent S, et al. Exposure to home-based pediatric palliative and hospice care and its impact on hospital and emergency care charges at a single institution. *J Palliat Med* 2014;17:183-8.
7. Gans D, Kominski GF, Roby DH, et al. *Better outcomes, lower costs: palliative care program reduces stress, costs of care for children with life-threatening conditions*. Los Angeles: UCLA Center for Health Policy Research; 2012.

8. Pascuet E, Cowin L, Vaillancourt R, et al. A comparative cost-minimization analysis of providing paediatric palliative respite care before and after the opening of services at a paediatric hospice. *Health Manage Forum* 2010;23:63-6.
9. Smith A, Andrews S, Maloney C, et al. Pediatric palliative care in high cost patients. In: Poss WB, editor. *Pediatric critical care medicine. Conference: American Academy of Pediatrics, Section on Critical Care National Conference and Exhibition*. Vol 26. Orlando (FL): Lippincott Williams and Wilkins; 2013. Available: <https://aap.confex.com/aap/2013/webprogram/Paper21649.html> (accessed 2015 Jan. 8).
10. Ward-Smith P, Korphage RM, Hutto C. Where health care dollars are spent when pediatric palliative care is provided. *Nurs Econ* 2008;26:175-8.
11. Belasco JB, Danz P, Drill A, et al. Supportive care: palliative care in children, adolescents, and young adults-model of care, interventions, and cost of care: a retrospective review. *J Palliat Care* 2000;16:39-46.
